# Supplementary material
Source: publisher figshare collection journal article supplement (https://tandf.figshare.com/ndownloader/files/13085345)
Supplement: Supplementary file 1 [file 13085345]

| Characteristic | Preoperative | | 1 year postop. | | 2 years postop. | | 5 years postop. | | Change from preoperative to 5 years | |
| --- | --- | --- | --- | --- | --- | --- | --- | --- | --- | --- |
|  | **Women** | **Men** | **Women** | **Men** | **Women** | **Men** | **Women** | **Men** | **Women** | **Men** |
| n | (49-138) | (12-46) | 110-117 | 31-32 | 86-119 | 28-42 | 127-137 | 42-46 |  |  |
| Weight (kg) | 130±17 | 159±22 | 87±14 | 110±19 | 86±15 | 110±20 | 93±17 | 122±21 | 37±16, (34,39),  n=137, p<0.001 | 37±15, (33,42),  n=46, p<0.001 |
| BMI (kg/m2) | 46.2±4.9 | 46.7±5.0 | 31.1±4.6 | 32.2±4.8 | 30.6±5.0 | 32.5±4.4 | 33.2±5.6 | 36.3±5.8 | 13.0±5.7 ,(12.0, 13.9), n=137, p<0.001 | 10.5±4.6 ,(9.1,11.8), n=46, p<0.001 |
| Hgb (g/dL) | 13.9±1.1 | 15.1±0.9 | 13.3±1.3 | 14.8±0.7 | 12.8±1.3 | 14.6±0.6 | 12.7±1.6 | 14.8±1.0 | 1.2±1.8, (0.9,1.5), n=133, p<0.001 | 0.3±0.9 ,(0.1,0.6),  n=46, p<0.05 |
| ferritin (µg/L) | 86.1±77 | 248±203 | 88.1±80 | 178±113 | 78.6±85 | 168±123 | 42.7±53 | 109±92 | 45.1±88.3, (29.6,60.3), n=127, p<0.001 | 142±176, (88,195), n=44, p<0.001 |
| transferrin (g/L) | 2.8±0.4 | 2.8±0.4 | 2.5±0.4 | 2.4±0.4 | 2.8±0.5 | 2.6±0.3 | 3.1±0.7 | 2.9±0.4 | -0.32±0.6 ,(-0.5,-0.2), n=80, p<0.001 | -0.2±0.4 ,(-0.4,-0.03), n=22, p<0.05 |
| TIBC (µmol/L) | 71.5±11 | 70.3±9.2 | 63.7±9.8 | 62.1±9.2 | 69.9±12 | 65.7±8.6 | 79.0±18 | 73.2±11 | -9.2±17.9, (-13.6,-4.8), n=67, p<0.001 | -5.4±9.5, (-9.9,-0.9), n=19, p<0.05 |
| CRP (mg/L) | 12.9±10 | 8.8±7.1 | 2.8±5.3 | 1.6±1.2 | 2.9±9.7 | 4.8±14 | 2.2±3.0 | 2.1±3.9 | 10.5±9.6, (8.6, 12.3), n=106, p<0.001 | 7.4±1.2, (4.0,8.8),  n=39, p<0.001 |
| s-Fe (µmol/L) | 13.3±7.7 | 16.3±3.9 | 17.1±6.3 | 22.4±6.5 | 16.2±6.4 | 19.6±6.3 | 13.7±6 | 18.9±6.4 | 0.91±8.8 ,(-1.0, 2.9), n=81, ns | -3.6±7.8 ,(-6.9,-0.3), n=24, p<0.05 |
| MCV (fL) | 87.4±5.1 | 88.5±3.0 | 89.5±5.2 | 90.3±3.4 | 88.5±5.5 | 90.5±3.1 | 86.9±7.2 | 89.7±3.7 | 1.1±7.5, (-0.6,2.8), n=75, ns | -0.9±2.4, (-1.9, 0.18), n=23, ns |
| vitamin B12 (pmol/L) | 339±178 | 323±117 | 540±295 | 427±190 | 588±310 | 493±186 | 563±332 | 549±321 | -226±320, (-282,-170), n=129, p<0.001 | -234±332, (-336,-134), n=44, p<0.001 |
| folate (nmol/L) | 14.2±7.4 | 14.3±6.1 | 20.0±9.3 | 18.9±6.7 | 21.6±8.9 | 19.6±8.3 | 23.4±11 | 22.2±8.8 | -8.9±11.6, ( -10.9,-6.8), n=127, p<0.001 | -8.1±10.2, (-11.2,-5.0), n=45, p<0.001 |

Change from before to 5 years after Roux en Y gastric bypass was calculated by the use of paired sampled t-test. Mean levels in the column that describe change from preoperative to 5 years after surgery reflect the change only in the patients with available values both preoperative and 5 years after surgery. A 2-tailed significance level was used to calculate paired t-test.
